# Supplementary material for: Salvianolic acid B induced upregulation of miR-30a protects cardiac myocytes from ischemia/reperfusion injury
Source: BMC Complement Altern Med. 2016 Sep 1;16(1):336. doi: 10.1186/s12906-016-1275-x (PMC5009695; doi:10.1186/s12906-016-1275-x)
Supplement: Additional file 1: — Availability of supporting data. (XLSX 14 kb) [file 12906_2016_1275_MOESM1_ESM.xlsx]

## Sheet: Fig.1
Fig.1A			Fig.1B
group	Relative expression (%)		group	Relative expression (%)
Control	100		Control	100
I-2h/R-2h	75.369±20.073		Sal B-25μM	99.667±28.655
I-2h/R-6h	60.38±15.637*		Sal B-50μM	171.507±43.489*
I-2h/R-24h	47.260±21.327*		Sal B-100μM	213.411±85.683*

## Sheet: Fig.2
Fig.2A			Fig.2B
group	Beclin 1 protein expression (%)		group	LC3 protein expression (%)
Control	100		Control	100
I-R	218.814±18.698**		I-R	208.933±39.189**
Sal B	117.475±12.476##		Sal B	107.516±30.383##

## Sheet: Fig.3
Fig.3A			Fig.3B
group	cell viability (%)		group	LDH leakage (%)
Control	100		Control	100
I-R	90.016±1.873**		I-R	217.216±66.507**
Sal B	94.406±2.766##		Sal B	149.045±24.352#

## Sheet: Fig.4
Fig.4
group	Beclin 1 protein expression (%)
I-R	100
Sal B	54.190±9.964*
inhibitor+Sal B	103.997±23.783#
Scramble+Sal B	63.010±9.038%

## Sheet: Fig.5
Fig.5A			Fig.5B
group	Beclin 1 protein expression (%)		group	p-AKT protein expression (%)
I-R	100		I-R	100
Sal B	66.237±11.218*		Sal B	176.954±21.510**
mimics+Sal B	45.505±6.912#		mimics+Sal B	226.352±20.500#
mimics+Sal B+LY294002	88.283±9.988%%		mimics+Sal B+LY294002	153.407±9.020%%
